# Supplementary material for: Comparison of Gut Bacterial Communities of Locusta migratoria manilensis (Meyen) Reared on Different Food Plants
Source: MDPI journal article supplement (doi:10.3390/biology11091347), 2022-09-13
Supplement: s1 [file s1]

**Table S1. Summary of high-throughput sequencing statistics obtained for each sample evaluated in the present study.**

| <b>Sample ID</b> | <b>Raw reads</b> | <b>Clean reads</b> | <b>Effective reads</b> | <b>AvgLen (bp)</b> | <b>GC (%)</b> | <b>Effective (%)</b> |
|------------------|------------------|--------------------|------------------------|--------------------|---------------|----------------------|
| Ma1              | 107096           | 107086             | 104526                 | 477                | 54.20         | 97.60                |
| Ma2              | 107705           | 107687             | 105482                 | 477                | 53.78         | 97.94                |
| Ma3              | 102341           | 102330             | 101997                 | 477                | 53.45         | 99.66                |
| Gg1              | 103479           | 103462             | 101319                 | 477                | 53.90         | 97.91                |
| Gg2              | 109241           | 109227             | 107829                 | 477                | 54.60         | 98.71                |
| Gg3              | 104496           | 104485             | 102215                 | 477                | 53.87         | 97.82                |
| Sb1              | 107840           | 107806             | 104571                 | 477                | 52.46         | 96.97                |
| Sb2              | 103788           | 103769             | 101632                 | 477                | 53.25         | 97.92                |
| Sb3              | 106675           | 106652             | 104240                 | 477                | 53.07         | 97.72                |
| Cc1              | 106511           | 106505             | 100088                 | 477                | 54.68         | 93.97                |
| Cc2              | 102145           | 102131             | 99879                  | 477                | 55.07         | 97.78                |
| Cc3              | 104643           | 104637             | 103106                 | 477                | 54.98         | 98.53                |

Average length (bp) is the average sequence length of all samples. GC (%) is the percentage of G and C type bases in the total base. Effective (%) is the percentage of effective reads in raw reads.
