# Supplementary material for: Comparison of Gut Bacterial Communities of Locusta migratoria manilensis (Meyen) Reared on Different Food Plants
Source: MDPI journal article supplement (doi:10.3390/biology11091347), 2022-09-13
Supplement: s1 [file s1]

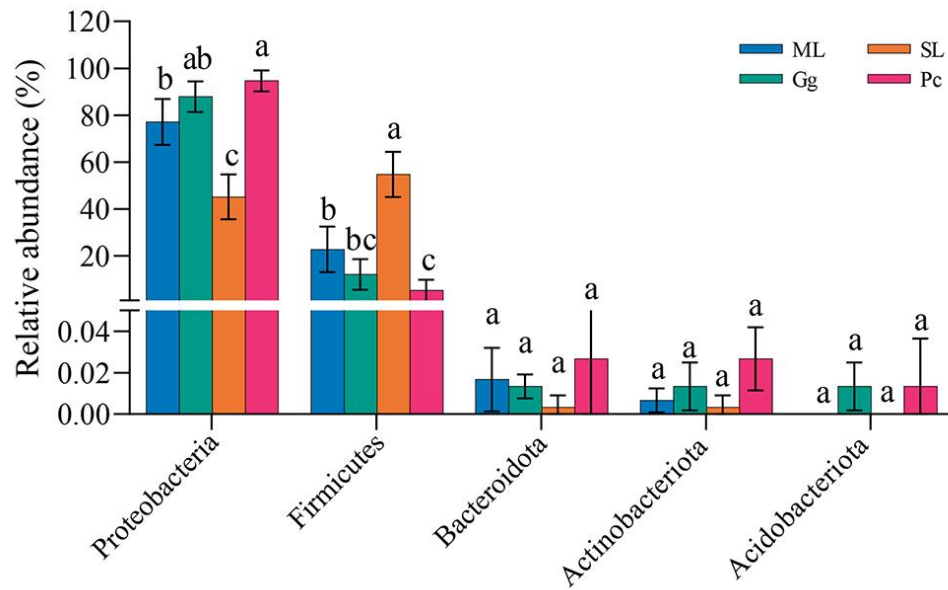

**Figure S2. The top 5 relative abundances of bacteria at the phylum level in the gut of *Locusta migratoria manilensis* fed on four different food plants.** ML: maize leaves; Gg: goosegrass; SL: soybean leaves; Pc: pakchoi. Bars marked by different lowercase letters are significantly different based on Turkey's HSD analysis at  $P < 0.05$ .
