# Supplementary material for: Comparison of Gut Bacterial Communities of Locusta migratoria manilensis (Meyen) Reared on Different Food Plants
Source: MDPI journal article supplement (doi:10.3390/biology11091347), 2022-09-13
Supplement: s1 [file s1]

**Table S2. The top 10 relative abundances at the family level in *Locusta migratoria manilensis* fed on four different food plants.**

| <b>Taxonomy</b>    | <b>Maize leaves</b>      | <b>Goosegrass</b>        | <b>Soybean leaves</b>    | <b>Pakchoi</b>           |
|--------------------|--------------------------|--------------------------|--------------------------|--------------------------|
| Enterobacteriaceae | 75.88±9.106 <sup>a</sup> | 85.92±7.005 <sup>a</sup> | 44.79±9.690 <sup>b</sup> | 84.37±5.735 <sup>a</sup> |
| Streptococcaceae   | 9.38±4.324 <sup>b</sup>  | 4.20±1.625 <sup>b</sup>  | 35.56±9.110 <sup>a</sup> | 4.72±4.442 <sup>b</sup>  |
| Lactobacillaceae   | 13.4±6.846 <sup>ab</sup> | 7.44±4.662 <sup>bc</sup> | 18.85±1.280 <sup>a</sup> | 0.16±0.100 <sup>c</sup>  |
| Morganellaceae     | 0.26±0.224 <sup>a</sup>  | 0.57±0.462 <sup>a</sup>  | 0.03±0.030 <sup>a</sup>  | 6.12±6.292 <sup>a</sup>  |
| Hafniaceae         | 0.41±0.504 <sup>a</sup>  | 0.56±0.504 <sup>a</sup>  | 0.00±0.010 <sup>a</sup>  | 2.77±2.362 <sup>a</sup>  |
| Erwiniaceae        | 0.41±0.311 <sup>a</sup>  | 0.56±0.655 <sup>a</sup>  | 0.34±0.200 <sup>a</sup>  | 0.18±0.108 <sup>a</sup>  |
| Enterococcaceae    | 0.01±0.012 <sup>a</sup>  | 0.43±0.561 <sup>a</sup>  | 0.39±0.300 <sup>a</sup>  | 0.22±0.198 <sup>a</sup>  |
| Moraxellaceae      | 0.08±0.040 <sup>ab</sup> | 0.03±0.029 <sup>b</sup>  | 0.00±0.010 <sup>b</sup>  | 0.48±0.297 <sup>a</sup>  |
| Yersiniaceae       | 0.00±0.006 <sup>a</sup>  | 0.05±0.061 <sup>a</sup>  | 0.00±0.010 <sup>a</sup>  | 0.53±0.777 <sup>a</sup>  |
| Pseudomonadaceae   | 0.09±0.061 <sup>a</sup>  | 0.14±0.211 <sup>a</sup>  | 0.00±0.010 <sup>a</sup>  | 0.07±0.017 <sup>a</sup>  |

Data are reported as the mean ± SE. Different lowercase letters (a, b, c) indicate significant differences in the mean values of relative abundance within the same line. Same lowercase letters indicate no significant difference between sample groups. Different lowercase letters indicate significant differences in the mean values among sample groups (One-way ANOVA, Tukey post-hoc test,  $p < 0.05$ ).
