# Supplementary material for: Comparison of Gut Bacterial Communities of Locusta migratoria manilensis (Meyen) Reared on Different Food Plants
Source: MDPI journal article supplement (doi:10.3390/biology11091347), 2022-09-13
Supplement: s1 [file s1]

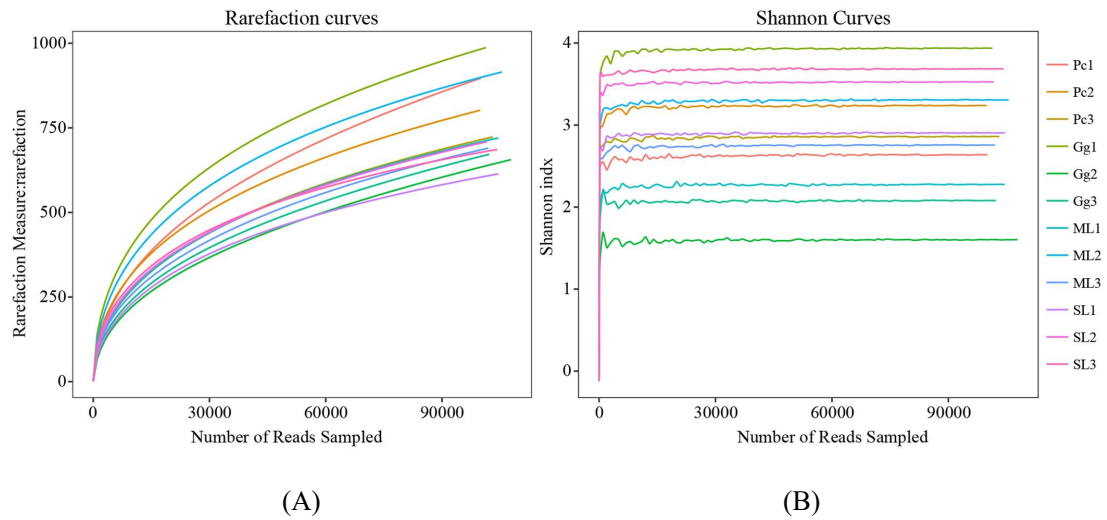

**Figure S1. (A) Sample rarefaction curves and (B) Shannon index rarefaction curves of individual samples for metagenomic analysis of gut microbiota of *Locusta migratoria manilensis* fed on four different food plants. ML: maize leaves; Gg: goosegrass; SL: soybean leaves; Pc: pakchoi.**
